# Supplementary material
Source: PubMed Central journal article supplement (PMC4571693)
Supplement: rspb20151045supp1.pdf [file rspb20151045supp1.pdf]

**Table S1.** Table of selected megafossils from the late-Barremian to middle Albian that have been explicitly linked with eudicots in the published literature. Note that lobed leaves with smooth margins may have teeth at the apices of lobes.

| species [citation]                       | age (Ma) | habit   | leaf org.  | size       | lobation | margin  | teeth      | environment             |
|------------------------------------------|----------|---------|------------|------------|----------|---------|------------|-------------------------|
| <i>Achaenocarpites capitellatus</i> [82] | 113-105  | herb    | compound   | nanophyll  | lobed    | smooth  | glandular  | wetland/<br>floodplain  |
| <i>Archaeofructus</i> spp.[83,84]        | 127-123  | herb    | nonlaminar | NA         | NA       | smooth  | Indet.     | lacustrine              |
| <i>Iterophyllum lobatum</i> [44]         | 127-113  | herb    | simple     | microphyll | lobed    | smooth  | glandular  | lacustrine              |
| LC-Microphyll trifoliate[85]             | 120-113  | unknown | compound   | nanophyll  | lobed    | smooth  | glandular  | lacustrine              |
| <i>Leefructus mirus</i> [86]             | 124-123  | herb    | simple     | notophyll  | lobed    | smooth  | glandular? | lacustrine              |
| <i>Potomacarpus apeleutheron</i> [24]    | 125-113  | unknown | compound   | leptophyll | lobed    | smooth  | glandular  | fine-grained<br>fluvial |
| <i>Crataegites borealis</i> [87]         | 113-105  | unknown | simple     | microphyll | lobed    | toothed | glandular  | fine-grained<br>fluvial |
| <i>Sagaria cilentana</i> [88]            | 109-105  | herb    | simple     | leptophyll | lobed    | smooth  | glandular  | lacustrine              |
| <i>Sinocarpus decussatus</i> [89]        | 124-123  | herb    | simple     | nanophyll  | unlobed  | toothed | glandular  | lacustrine              |
| <i>Ternaricarpites floribundus</i> [82]  | 113-105  | herb    | simple?    | nanophyll  | lobed    | smooth  | unknown    | wetland/<br>floodplain  |
| <i>Vitiphyllum</i> spp.[33]              | 115-109  | herb    | simple     | microphyll | lobed    | toothed | glandular  | fine-grained<br>fluvial |
| <i>Fairlingtonia thyrsopteroides</i>     | 125-109  | Herb    | Simple     | leptophyll | lobed    | smooth  | glandular  | fine-grained<br>fluvial |

**Table S2.** Leaf measurements used to estimate leaf mass per area in *Fairlingtonia thyrsopteroides* based on the equation reported by Royer et al. (2010) for angiosperm herbs ( $\log[0.021] \times 0.2204 + 2.245 = \log[75.4 \text{ g} \times \text{mm}^{-2}]$ ).

|                | leaf area<br>(mm <sup>2</sup> ) | petiole width<br>(mm) | PW <sup>2</sup> /A |
|----------------|---------------------------------|-----------------------|--------------------|
| USNM 597572    | 6.78                            | 0.40                  | 0.024              |
| USGS 9030 23.3 | 16.27                           | 0.52                  | 0.017              |
| USNM 597570    | 12.10                           | 0.61                  | 0.031              |
| USNM 597571    | 23.27                           | 0.67                  | 0.019              |
| USNM 3394      | 16.54                           | 0.53                  | 0.017              |
|                |                                 | mean                  | 0.021              |

**Table S3.** Sites where *Fairlingtonia* has been collected.

| Locality                                                                   | pollen zone  |
|----------------------------------------------------------------------------|--------------|
| Intersection of Covington and E. Clement Streets, Baltimore, MD            | upper Zone I |
| Fredericksburg, VA                                                         | upper Zone I |
| near Lorton, VA                                                            | Zone I       |
| USGS loc. 9030, Hillside along Highway I-395; Fairlington, VA              | Zone I       |
| Road Side near Potomac Run; Stafford Co., VA                               | lower Zone I |
| Fish Hut above Dutch Gap; Henrico Co., VA                                  | lower Zone I |
| Entrance to Trent's Reach; Henrico Co., VA                                 | lower Zone I |
| Clay ball at base at base of the bluff at Dutch Gap Canal; Henrico Co., VA | lower Zone I |
| Gray clay beds at base of the bluff at Dutch Gap Canal; Henrico Co., VA    | lower Zone I |

## History of *Fairlingtonia*

*Fairlingtonia thyrsopteroides* was first described as a new species of fern in the genus *Sphenopteris* by Fontaine from the “Fish Hut above Dutch Gap Canal,” and “Fredericksburg” localities[1]. The specimens from Fredericksburg are lost, but one specimen (Figure 3B) lacks information about where it was collected and has matrix very similar to other fossils from Fredericksburg. This is probably the lost syntype. Berry[2] transferred *S. thyrsopteroides* to *Ruffordia goeppertii* (Dunker) Seward, (also a fern) and noted that the material identified by Fontaine as *Sphenopteris pachyphylla* and *S. spatulata* is indistinguishable from that of *S. thyrsopteroides*. The figured specimens of *S. pachyphylla* and *S. spatulata* were collected from “Entrance to Trent’s Reach”[1]. *Thyrsopteris pachyphylla* Fontaine from the “roadside near Potomac Run” near Lorton, VA also conforms to this species[1]. Doyle and Upchurch[3] figured a specimen from the Dutch Gap locality identified as *Vitiphyllum parvifolium* Fontaine. Assuming Fontaine’s illustrations are accurate, the lost holotype of *V. parvifolium* is not *Fairlingtonia* because the leaves have a pedate to catadromous arrangement of the lobes similar to a simplified *V. multifidum*. However, the size of the stems and leaves are similar to *Fairlingtonia* and Fontaine’s description included a comparison with extant *Synaphea polymorpha* (Proteaceae), which has anadromous leaves. The syntype of *V. parvifolium* (USNM 337551) has leaves that are larger, more dissected, and very similar to *V. multifidum*. Jud[4] figured morphotype PA9 from Fairlington, VA, which also conforms to *Fairlingtonia*.
