# Supplementary material
Source: PubMed Central journal article supplement (PMC4571693)
Supplement: rspb20151045supp2.pdf [file rspb20151045supp2.pdf]

Jud\_Supplement 2.nex

#NEXUS

[Characters and character states scored by Nathan A Jud, constraint tree topology from APwebsite, 2014]

```
begin taxa;
    dimensions ntax=58;
    taxlabels
Osmun
Gnetu      Ambor      Trime      Cabom      Nupha      Austr
Schiz      Illic      Chlor      Myris      Illig      Drimy
Piper      Peper      Asaru      Acoru      Arisa      Lasia
Cerat      Eupte      Pteri      Hypec      Coryd      Fumar
Stylm      Macle      Sangu      Glauc      Styln
Hunne      Lardi      Circa      Menis      Berbe      Ranun
Exnel      Nelum      Sapin      Plata      Belle      Placo
Symph      Isopo      Petro      Synap      Knigh      Sphal
Musgr      Ausmu      Hakea      Steno      Carna      Sabia
Troch      Tetra      Fairl      Selag
    ;

end;

[
Characters
1 habit (0) herbaceous (1) woody
2 branching (0) dichotomous (1) branches subtend leaves (2) leaves subtend
branches
3 megaphylls (sp) (0) absent (1) present
4 leaves (0) sessile (1) petiolate
5 petiole attachment: (0) marginal (1) peltate
6 leaves (0) simple (1) compound
7 primary vein framework (0) pinnate (1) actinodromous (2) palinactinodromous (3)
reticulodromous (4) campylodomous (5) open (6) parallel
8 mode of leaf dissection (0) undissected (1) basipetal (2) acropetal (3)
Polyternate (4) basipetal pedate (5) acropetal anadromous (6) other
9 apical fusion of primary/secondary veins (0) absent (1) present
10 intramarginal vein (0) absent (1) present
11 minor tertiary veins (0) absent (1) reticulate (2) percurrent
12 freely ending veinlets (0) absent (1) present
13 leaf margin (0) smooth (1) teeth at major veins (2) serrate
14 glandular/hydathodal teeth (0) absent (1) present
15 stipules (0) absent (1) present (2)interpetiolar
]

begin characters;
    dimensions nchar=15;
```

Jud\_Supplement 2.nex

format symbols = "01234567";  
matrix

Osmun 0007777777777777  
Gnetu 121100000011000  
Ambor 121100000011210  
Trime 0210?000000000  
Cabom 0211(0 1)(0 1)1?0010000  
Nupha 02111000001000(0 1)  
Austr 121100000021002  
Schiz 121100000021210  
Illic 1211000000(1 2)1000  
Chlor (0 1)21100000021212  
Myris 121100000021000  
Illig 1211010?0021000  
Drimy 121100000011000  
Piper 021100(0 4)00021002  
Peper 021110400021002  
Asaru 021110200010000  
Acoru 0210?0601010000  
Arisa 021111061110000  
Lasia 021110061010100  
Cerat 0210?0561000000  
Eupte 121100000021200  
Pteri 021101011000110  
Hypec 0211010(1 2)1110110  
Coryd 0211013(2 3 4)1110110  
Fumar 0211013(2 3 4)1110110  
Stylm 021101010111010  
Macle 021101040021210  
Sangu 021100240011100  
Glauc 02110011001(0 1)210  
Styln 021101021110110  
Hunne 021101041110110  
Lardi 12110104000(1 2)(0 1)00  
Circa 0210?0500000100  
Menis 0211(0 1)01(0 4)0011(0 1)(0 1)0  
Berbe 1211000(0 1)0(0 1)1(0 1)(0 2)0(0 1)  
Ranun 0211(0 1)(0 1)2(0 4)0(0 1)10(1 2)(0 1)0  
Exnel 0?11101001(1 2)131?  
Nelum 021110100020002  
Sapin 121101020(0 1)1?(0 2)0?  
Plata 1211(0 1)1240021201  
Belle (0 1)21100040111110  
Placo 121100020021000  
Symph (0 1)21100240???1?0  
Isopo (0 1)2110(0 1)0(0 5)?110110  
Petro 121100050110100

```
Synap (0 1)211000(4 5)0110110
Knigh 121100000021210
Sphal 12110(0 1)000021200
Musgr 121100020021000
Ausmu 12110(0 1)(0 4)20021000
Hakea 121100(0 2 4)(0 4)(0 1)110(0 1 2)00
Steno 121100120021000
Carna 121101060011200
Sabia 121100000021000
Troch 121100000021210
Tetra 121100100021210
Fairl 021100051110110
Selag 0007777777777777
```

;

end;

begin assumptions;

options deftype = ord;

end;

begin trees;

Title Tracheophytes;

LINK Taxa = Taxa;

TRANSLATE

```
[0] 1 Osmun,
[1] 2 Gnetu,
[7] 3 Ambor,
[8] 4 Trime,
[9] 5 Cabom,
[10] 6 Nupha,
[11] 7 Austr,
[12] 8 Schiz,
[13] 9 Illic,
[14] 10 Chlor,
[15] 11 Myris,
[16] 12 Illig,
[17] 13 Drimy,
[18] 14 Piper,
[19] 15 Peper,
[20] 16 Asaru,
[21] 17 Acoru,
[22] 18 Arisa,
[23] 19 Lasia,
[24] 20 Cerat,
[25] 21 Eupte,
[26] 22 Pteri,
[27] 23 Hypec,
[28] 24 Coryd,
```

Jud\_Supplement 2.nex

```
[29]          25 Fumar,
[30]          26 Stylm,
[31]          27 Macle,
[32]          28 Sangu,
[33]          29 Glauc,
[34]          30 Styln,
[35]          31 Hunne,
[36]          32 Lardi,
[37]          33 Circa,
[38]          34 Menis,
[39]          35 Berbe,
[40]          36 Ranun,
[41]          37 Exnel,
[42]          38 Nelum,
[43]          39 Sapin,
[44]          40 Plata,
[45]          41 Belle,
[46]          42 Placo,
[47]          43 Symph,
[48]          44 Isopo,
[49]          45 Petro,
[50]          46 Synap,
[51]          47 Knigh,
[52]          48 Sphal,
[53]          49 Musgr,
[54]          50 Ausmu,
[55]          51 Hakea,
[56]          52 Steno,
[57]          53 Carna,
[58]          54 Sabia,
[59]          55 Troch,
[60]          56 Tetra,
[61]          57 Fairl,
[62]          58 Selag;
      TREE *Euphylls =
(58,(1,(2,(3,((4,(6,5)),((9,(8,7))),((10,((11,12),(13,(16,(14,15)))))),((17,(18,19)),
(20,(((55,56),(54,((37,38)),((39,40)),((41,42)),((51,52),(43,((46,(44,45)),(53,(47,(48
,(49,50)))))))))))))),(21,(((33,32),(34,(36,35))),(22,((31,(30,(28,(27,(29,26))))),(2
3,(24,25)))))))))))))))));
END;

Begin PAUP;
PSet MSTaxa = Polymorph;
Outgroup Selag [/Only];
hsearch swap= TBR hold= 9 constraints= Euphylls enforce=yes;
savetrees;
contree all/strict=yes treefile=FairCon6.tre;
contree all/strict=no adams=yes treefile=FairAdams.tre;
```

Jud\_Supplement 2.nex

END;
