# Supplementary material
Source: PubMed Central journal article supplement (PMC4571693)

**Supplement 3.** Illustration of USNM 597572, from figure 3C showing the attached stems (brown) and leaves (green).

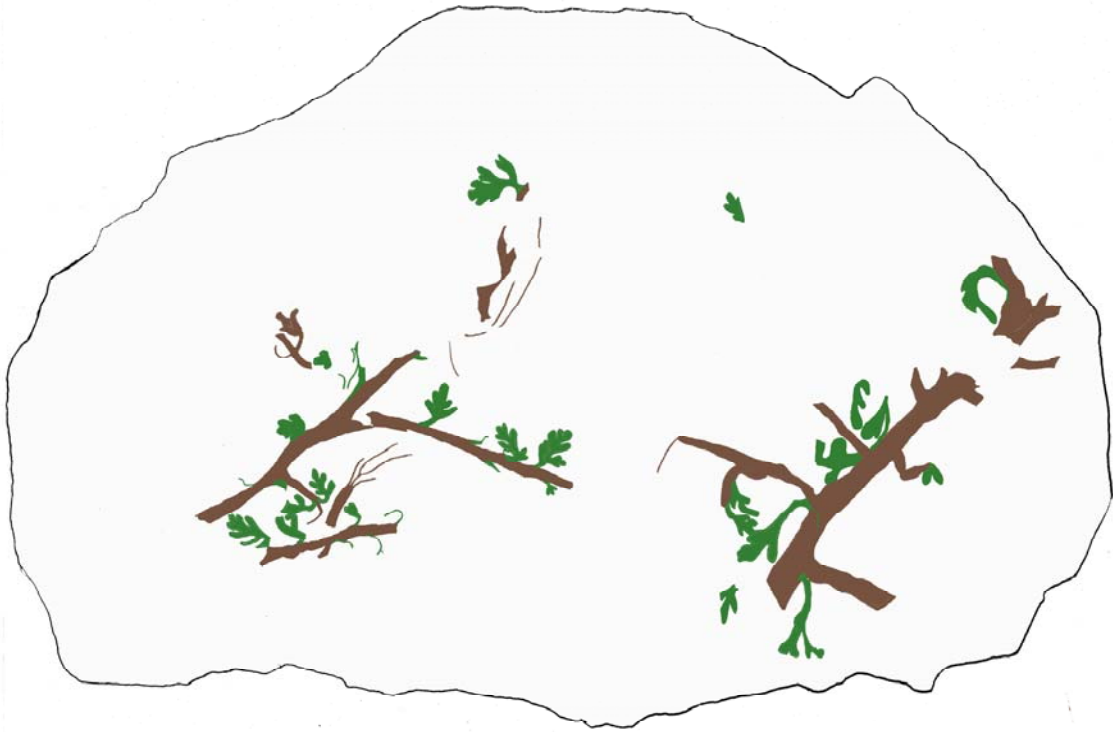

Supplement: rspb20151045supp3.pdf [file rspb20151045supp3.pdf]
